# Supplementary material for: Investigating the level of agreement of two positioning protocols when using dual energy X-ray absorptiometry in the assessment of body composition
Source: PeerJ. 2017 Oct 16;5:e3880. doi: 10.7717/peerj.3880 (PMC5647860; doi:10.7717/peerj.3880)
Supplement: Data S1 [file peerj-05-3880-s001.xlsx]

## Sheet: Participants
Participant	Height	Weight	DOB	Age		Prefered BMC Scan	Non dominant side	Sex
2	152.9	51.9	1993-05-20	23 Years, 7 Months, 18 Days		Nana	Left	F
4	158.4	55.1	1991-05-25	25 Years, 7 Months, 13 Days		NHANES	Left	F
6	177.8	61.5	1991-05-06	25 Years, 8 Months, 1 Days		NHANES	Left	F
8	156	52.4	1992-12-19	24 Years, 0 Months, 19 Days		NHANES	Left	F
9	170	67	1993-03-29	23 Years, 9 Months, 9 Days		Nana	Left	F
11	158.3	79.5	1994-06-26	22 Years, 6 Months, 12 Days		NHANES	Left	F
12	158.3	56.5	1993-05-27	23 Years, 7 Months, 11 Days		NHANES	Left	F
13	170.6	58.6	1991-06-19	25 Years, 6 Months, 19 Days		Nana	Left	F
15	166.6	57.8	1984-02-22	32 Years, 10 Months, 16 Days		NHANES	Left	F
18	175.2	72.5	1975-04-25	41 Years, 8 Months, 13 Days		NHANES	Left	F
19	156.6	58.2	1959-04-28	57 Years, 8 Months, 10 Days		NHANES	Left	F
20	178.7	65.6	1957-06-04	59 Years, 7 Months, 3 Days		NHANES	left	F
21	172.7	61.9	1982-01-14	34 Years, 11 Months, 24 Days		NHANES	Left	F
22	154.2	53.6	1992-10-31	24 Years, 2 Months, 7 Days		NHANES	Right	F
24	163.9	84.3	1992-07-10	24 Years, 5 Months, 28 Days		NHANES	Left	F
TOTAL	164.68	62.4267	1985-09-07 06:24:00	31 Years, 4 Months, 0 Days		#REF!	#REF!	#REF!
1	188.3	87.8	1978-03-23	38 Years, 9 Months, 15 Days		Nana	Left	M
3	178.5	71.7	1992-06-10	24 Years, 6 Months, 28 Days		Nana	Left	M
5	162.5	69.4	1991-08-13	25 Years, 4 Months, 25 Days		NHANES	Left	M
7	184.2	71.3	1990-04-24	26 Years, 8 Months, 14 Days		NHANES	Left	M
10	177.2	98.6	1992-04-11	24 Years, 8 Months, 27 Days		NHANES	Left	M
14	174.6	74.7	1992-09-20	24 Years, 3 Months, 18 Days		NHANES	Left	M
16	166.7	66.5	1991-04-26	25 Years, 8 Months, 12 Days		NHANES	Left	M
17	175.5	77.3	1993-03-26	23 Years, 9 Months, 12 Days		NHANES	Right	M
23	179.7	88.6	1989-10-20	27 Years, 2 Months, 18 Days		NHANES	Left	M
25	178.7	82.1	1990-11-06	26 Years, 2 Months, 1 Days		NHANES	Left	M
26	187	83.8	1992-06-08	24 Years, 6 Months, 30 Days		Nana	Left	M
27	183.3	81.5	1991-04-22	25 Years, 8 Months, 16 Days		NHANES	Right	M
28	188.2	82	1993-08-26	23 Years, 4 Months, 12 Days		NHANES	Left	M
29	177.2	79.3	1966-09-20	50 Years, 3 Months, 18 Days			Left	M
30	178.7	68.8	1991-08-19	25 Years, 4 Months, 19 Days			Left	M
TOTAL	178.687	78.8933	1989-03-27	27 Years, 9 Months, 11 Days		22	27	15
Participant	Height	Weight	DOB	Age		Prefered BMC Scan	Non dominant side	Sex
1	188.3	87.8	1978-03-23	38 Years, 9 Months, 15 Days	38.8	Nana	Left	M
2	152.9	51.9	1993-05-20	23 Years, 7 Months, 18 Days	23.6	Nana	Left	F
3	178.5	71.7	1992-06-10	24 Years, 6 Months, 28 Days	24.6	Nana	Left	M
4	158.4	55.1	1991-05-25	25 Years, 7 Months, 13 Days	25.6	NHANES	Left	F
5	162.5	69.4	1991-08-13	25 Years, 4 Months, 25 Days	25.4	NHANES	Left	M
6	177.8	61.5	1991-05-06	25 Years, 8 Months, 1 Days	25.7	NHANES	Left	F
7	184.2	71.3	1990-04-24	26 Years, 8 Months, 14 Days	26.7	NHANES	Left	M
8	156	52.4	1992-12-19	24 Years, 0 Months, 19 Days	23.11	NHANES	Left	F
9	170	67	1993-03-29	23 Years, 9 Months, 9 Days	23.8	Nana	Left	F
10	177.2	98.6	1992-04-11	24 Years, 8 Months, 27 Days	24.8	NHANES	Left	M
11	158.3	79.5	1994-06-26	22 Years, 6 Months, 12 Days	22.5	NHANES	Left	F
12	158.3	56.5	1993-05-27	23 Years, 7 Months, 11 Days	23.6	NHANES	Left	F
13	170.6	58.6	1991-06-19	25 Years, 6 Months, 19 Days	25.5	Nana	Left	F
14	174.6	74.7	1992-09-20	24 Years, 3 Months, 18 Days	24.2	NHANES	Left	M
15	166.6	57.8	1984-02-22	32 Years, 10 Months, 16 Days	32.9	NHANES	Left	F
16	166.7	66.5	1991-04-26	25 Years, 8 Months, 12 Days	25.7	NHANES	Left	M
17	175.5	77.3	1993-03-26	23 Years, 9 Months, 12 Days	23.8	NHANES	Right	M
18	175.2	72.5	1975-04-25	41 Years, 8 Months, 13 Days	41.7	NHANES	Left	F
19	156.6	58.2	1959-04-28	57 Years, 8 Months, 10 Days	57.7	NHANES	Left	F
20	178.7	65.6	1957-06-04	59 Years, 7 Months, 3 Days	59.6	NHANES	left	F
21	172.7	61.9	1982-01-14	34 Years, 11 Months, 24 Days	34.11	NHANES	Left	F
22	154.2	53.6	1992-10-31	24 Years, 2 Months, 7 Days	24.1	NHANES	Right	F
23	179.7	88.6	1989-10-20	27 Years, 2 Months, 18 Days	27.1	NHANES	Left	M
24	163.9	84.3	1992-07-10	24 Years, 5 Months, 28 Days	24.5	NHANES	Left	F
25	178.7	82.1	1990-11-06	26 Years, 2 Months, 1 Days	26.1	NHANES	Left	M
26	187	83.8	1992-06-08	24 Years, 6 Months, 30 Days	24.6	Nana	Left	M
27	183.3	81.5	1991-04-22	25 Years, 8 Months, 16 Days	25.7	NHANES	Right	M
28	188.2	82	1993-08-26	23 Years, 4 Months, 12 Days	23.3	NHANES	Left	M
29	177.2	79.3	1966-09-20	50 Years, 3 Months, 18 Days	50.2	NHANES	Left	M
30	178.7	68.8	1991-08-19	25 Years, 4 Months, 19 Days	25.3	NHANES	Left	M
TOTAL	171.683	70.66	1987-06-17 15:12:00	29 Years, 6 Months, 21 Days	29.6	24	27	15
					10.0811

## Sheet: Nana1
Participant	Tissue (% fat)	Region (%fat)	Tissue (g)	Tissue (kgs)	Fat (g)	Fat (kgs)	Lean (g)	Lean (kgs)	BMC (g)	BMC (kgs)	Total Mass (kg)
1	23	21.9	84540	84.54	19412	19.412	65128	65.128	3914	3.914	88.5
2	28.5	27.4	50423	50.423	14359	14.359	36064	36.064	2005	2.005	52.4
3	23.8	22.9	69414	69.414	16526	16.526	52888	52.888	2812	2.812	72.2
4	31.3	30	53414	53.414	16716	16.716	36697	36.697	2259	2.259	55.7
5	17.7	17	67583	67.583	11958	11.958	55624	55.624	2622	2.622	70.2
6	26.3	25.2	59482	59.482	15624	15.624	43857	43.857	2559	2.559	62
7	13.5	12.8	68579	68.579	9242	9.242	59337	59.337	3577	3.577	72.2
8	28.9	27.9	51106	51.106	14778	14.778	36328	36.328	1858	1.858	53
9	37.8	36.4	65005	65.005	24574	24.574	40431	40.431	2432	2.432	67.4
10	34.6	33.5	95626	95.626	33121	33.121	62504	62.504	3190	3.19	98.8
11	42	40.7	77592	77.592	32593	32.593	44999	44.999	2448	2.448	80
12	29.4	28.2	53801	53.801	15818	15.818	37983	37.983	2335	2.335	56.1
13	31.1	29.8	56838	56.838	17666	17.666	39172	39.172	2539	2.539	59.4
14	23.1	22.2	72879	72.879	16800	16.8	56080	56.08	2771	2.771	75.7
15	31.9	30.6	55795	55.795	17821	17.821	37974	37.974	2487	2.487	58.3
16	21.1	20.2	63804	63.804	13471	13.471	50333	50.333	2774	2.774	66.6
17	22.9	22	75130	75.13	17183	17.183	57946	57.946	2838	2.838	78
18	30.2	29	70175	70.175	21173	21.173	49002	49.002	2710	2.71	72.9
19	34.2	32.9	56581	56.581	19354	19.354	37227	37.227	2161	2.161	58.7
20	28.8	27.6	63421	63.421	18278	18.278	45143	45.143	2823	2.823	66.2
21	36.4	35	60054	60.054	21844	21.844	38209	38.209	2393	2.393	62.4
22	30	28.9	52070	52.07	15601	15.601	36469	36.469	1996	1.996	54.1
23	18.1	17.4	85890	85.89	15536	15.536	70354	70.354	3491	3.491	89.4
24	42.7	41.5	82218	82.218	35114	35.114	47104	47.104	2359	2.359	84.6
25	20.8	20	79681	79.681	16608	16.608	63073	63.073	3255	3.255	82.9
26	26.9	25.8	81214	81.214	21823	21.823	59392	59.392	3272	3.272	84.5
27	22.2	21.3	82475	82.475	18287	18.287	64188	64.188	3235	3.235	85.7
28	16.1	15.5	79863	79.863	12873	12.873	66990	66.99	3054	3.054	82.9
29	17.3	16.5	76639	76.639	13237	13.237	63402	63.402	3406	3.406	80
30	17.6	16.8	66468	66.468	11705	11.705	54763	54.763	3238	3.238	69.7

## Sheet: Arms
	Tissue (% fat)	Tissue (% fat)	Tissue (% fat)	Region (%fat)	Region (%fat)	Region (%fat)	Tissue (g)		Tissue (g)		Tissue (g)		Fat (g)		Fat (g)		Fat (g)		Lean (g)		Lean (g)		Lean (g)		BMC (g)		BMC (g)		BMC (g)
Participant	NANA1	NANA2	NHANES	NANA1	NANA2	NHANES	NANA1		NANA2		NHANES		NANA1		NANA2		NHANES		NANA1		NANA2		NHANES		NANA1		NANA2		NHANES
1	20.7	20.6	22.7	19.7	19.6	21.5	11113	11.113	11218	11.218	10849	10.849	2304	2.304	2313	2.313	2467	2.467	8808	8.808	8905	8.905	8382	8.382	585	0.585	589	0.589	611	0.611
2	31.7	31.2	29.8	30.3	29.9	28.5	7091	7.091	7038	7.038	6722	6.722	2247	2.247	2199	2.199	2004	2.004	4845	4.845	4839	4.839	4718	4.718	327	0.327	322	0.322	303	0.303
3	20.9	20.9	23	19.9	19.9	21.8	8163	8.163	8163	8.163	7693	7.693	1706	1.706	1706	1.706	1768	1.768	6458	6.458	6458	6.458	5925	5.925	411	0.411	411	0.411	428	0.428
4	33.5	33.2	35	32	31.7	33.3	5888	5.888	5726	5.726	5296	5.296	1975	1.975	1902	1.902	1854	1.854	3913	3.913	3824	3.824	3442	3.442	286	0.286	282	0.282	278	0.278
5	15	15.4	15.9	14.5	14.8	15.3	10193	10.193	10176	10.176	10018	10.018	1533	1.533	1568	1.568	1596	1.596	8660	8.66	8607	8.607	8421	8.421	418	0.418	428	0.428	448	0.448
6	27.4	25	25.5	26	23.8	24.2	6335	6.335	6310	6.31	5737	5.737	1733	1.733	1579	1.579	1463	1.463	4601	4.601	4731	4.731	4274	4.274	323	0.323	318	0.318	318	0.318
7	13	11.4	12.1	12.3	10.8	11.4	9388	9.388	9221	9.221	8962	8.962	1219	1.219	1049	1.049	1088	1.088	8169	8.169	8172	8.172	7874	7.874	523	0.523	519	0.519	544	0.544
8	31.5	30.7	34.5	30.3	29.5	32.9	5601	5.601	5699	5.699	5373	5.373	1762	1.762	1747	1.747	1852	1.852	3838	3.838	3952	3.952	3521	3.521	225	0.225	231	0.231	249	0.249
9	37.6	38.4	40.8	36.1	36.9	39.1	7112	7.112	7191	7.191	6756	6.756	2672	2.672	2759	2.759	2756	2.756	4440	4.44	4432	4.432	4000	4	282	0.282	283	0.283	291	0.291
10	27	24.6	27.3	26	23.7	26.2	12854	12.854	12880	12.88	12808	12.808	3474	3.474	3164	3.164	3491	3.491	9380	9.38	9716	9.716	9317	9.317	497	0.497	486	0.486	508	0.508
11	47	45.2	50.3	45.4	43.8	48.5	9651	9.651	9675	9.675	9553	9.553	4533	4.533	4374	4.374	4805	4.805	5118	5.118	5301	5.301	4748	4.748	325	0.325	321	0.321	346	0.346
12	34.7	32.2	36.8	33.2	30.8	35	6329	6.329	6504	6.504	5842	5.842	2196	2.196	2092	2.092	2150	2.15	4133	4.133	4412	4.412	3691	3.691	293	0.293	281	0.281	294	0.294
13	31.6	31.6	36.9	30	30	34.8	6652	6.652	6348	6.348	6065	6.065	2105	2.105	2008	2.008	2239	2.239	4547	4.547	4339	4.339	3826	3.826	361	0.361	349	0.349	371	0.371
14	17.7	18.9	19.9	16.9	18.1	19	10211	10.211	10234	10.234	9857	9.857	1803	1.803	1933	1.933	1960	1.96	8408	8.408	8301	8.301	7897	7.897	427	0.427	427	0.427	449	0.449
15	34.1	32	39.1	32.4	30.5	37	6070	6.07	6269	6.269	6124	6.124	2070	2.07	2006	2.006	2393	2.393	3999	3.999	4263	4.263	3731	3.731	312	0.312	313	0.313	342	0.342
16	18.1	19.9	16.8	17.3	18.9	16	8278	8.278	8469	8.469	8309	8.309	1498	1.498	1683	1.683	1396	1.396	6780	6.78	6786	6.786	6913	6.913	390	0.39	413	0.413	413	0.413
17	18.1	18.7	21.4	17.4	17.9	20.5	10902	10.902	10942	10.942	10492	10.492	1977	1.977	2042	2.042	2243	2.243	8925	8.925	8900	8.9	8249	8.249	438	0.438	437	0.437	459	0.459
18	31.3	30.2	31.8	30.1	29.1	30.5	8773	8.773	8950	8.95	8164	8.164	2750	2.75	2707	2.707	2598	2.598	6023	6.023	6244	6.244	5566	5.566	374	0.374	363	0.363	367	0.367
19	33.5	34.1	39	32.1	32.7	37.2	6526	6.526	6628	6.628	6328	6.328	2186	2.186	2263	2.263	2470	2.47	4340	4.34	4365	4.365	3858	3.858	291	0.291	293	0.293	315	0.315
20	37.3	36.8	39.5	35.5	35	37.4	7202	7.202	7129	7.129	6895	6.895	2688	2.688	2627	2.627	2720	2.72	4514	4.514	4502	4.502	4175	4.175	364	0.364	366	0.366	381	0.381
21	41.8	37.9	43	40	36.4	41	6776	6.776	6901	6.901	6743	6.743	2835	2.835	2618	2.618	2899	2.899	3940	3.94	4282	4.282	3844	3.844	312	0.312	298	0.298	328	0.328
22	35.9	35	39.3	34.6	33.6	37.6	6172	6.172	6211	6.211	5644	5.644	2218	2.218	2171	2.171	2218	2.218	3953	3.953	4040	4.04	3426	3.426	248	0.248	244	0.244	248	0.248
23	16	15.8	17.2	15.3	15.2	16.4	12629	12.629	12461	12.461	12567	12.567	2016	2.016	1974	1.974	2159	2.159	10613	10.613	10487	10.487	10409	10.409	561	0.561	550	0.55	606	0.606
24	42.9	44.7	46.5	41.5	43.3	45	8636	8.636	9687	9.687	8672	8.672	3701	3.701	4334	4.334	4033	4.033	4935	4.935	5353	5.353	4639	4.639	283	0.283	311	0.311	299	0.299
25	15.6	17.1	19.4	15	16.4	18.6	10945	10.945	11186	11.186	11038	11.038	1712	1.712	1911	1.911	2145	2.145	9233	9.233	9275	9.275	8892	8.892	460	0.46	480	0.48	497	0.497
26	22.6	23.3	25.2	21.6	22.3	24	9869	9.869	9826	9.826	9731	9.731	2232	2.232	2291	2.291	2455	2.455	7638	7.638	7535	7.535	7276	7.276	464	0.464	468	0.468	487	0.487
27	19.4	19.5	19.1	18.5	18.6	18.2	11812	11.812	11537	11.537	10883	10.883	2290	2.29	2251	2.251	2083	2.083	9522	9.522	9287	9.287	8800	8.8	558	0.558	539	0.539	539	0.539
28	14.2	15.2	15.7	13.7	14.6	15	10789	10.789	10636	10.636	9983	9.983	1536	1.536	1615	1.615	1566	1.566	9253	9.253	9021	9.021	8417	8.417	455	0.455	458	0.458	460	0.46
29	15.7	16.5	19.2	14.9	15.8	18.2	10201	10.201	10170	10.17	9963	9.963	1599	1.599	1681	1.681	1915	1.915	8602	8.602	8489	8.489	8048	8.048	496	0.496	495	0.495	531	0.531
30	17.6	17.7	19.1	16.7	16.8	18.1	8894	8.894	8729	8.729	8375	8.375	1566	1.566	1546	1.546	1602	1.602	7329	7.329	7182	7.182	6773	6.773	469	0.469	468	0.468	471	0.471

## Sheet: Legs
	Tissue (% fat)	Tissue (% fat)	Tissue (% fat)	Region (%fat)	Region (%fat)	Region (%fat)	Tissue (g)		Tissue (g)		Tissue (g)		Fat (g)		Fat (g)		Fat (g)		Lean (g)		Lean (g)		Lean (g)		BMC (g)		BMC (g)		BMC (g)
Participant	NANA1	NANA2	NHANES	NANA1	NANA2	NHANES	NANA1		NANA2		NHANES		NANA1		NANA2		NHANES		NANA1		NANA2		NHANES		NANA1		NANA2		NHANES
1	26.2	26.9	25.7	24.9	25.5	24.4	29629	29.629	30011	30.011	29256	29.256	7773	7.773	8079	8.079	7523	7.523	21856	21.856	21933	21.933	21732	21.732	1618	1.618	1620	1.62	1603	1.603
2	31.7	30.9	32	30.5	29.8	30.8	17187	17.187	17010	17.01	16208	16.208	5441	5.441	5260	5.26	5187	5.187	11746	11.746	11750	11.75	11022	11.022	647	0.647	645	0.645	656	0.656
3	21.9	21.1	21	20.9	20.1	20.1	23646	23.646	23427	23.427	22936	22.936	5173	5.173	4933	4.933	4824	4.824	18472	18.472	18494	18.494	18111	18.111	1097	1.097	1089	1.089	1098	1.098
4	33.4	33	32.5	32.1	31.7	31.2	18205	18.205	18255	18.255	17732	17.732	6074	6.074	6028	6.028	5766	5.766	12131	12.131	12227	12.227	11966	11.966	745	0.745	753	0.753	765	0.765
5	17.4	17.6	16.9	16.7	16.9	16.1	21903	21.903	22156	22.156	21980	21.98	3816	3.816	3907	3.907	3706	3.706	18086	18.086	18250	18.25	18274	18.274	962	0.962	964	0.964	978	0.978
6	28.4	29.9	28.2	27.1	28.6	26.8	21497	21.497	21749	21.749	20212	20.212	6097	6.097	6514	6.514	5692	5.692	15400	15.4	15235	15.235	14520	14.52	1014	1.014	1034	1.034	1023	1.023
7	15	14.9	14.9	14.1	14	13.9	24626	24.626	23885	23.885	23392	23.392	3701	3.701	3566	3.566	3476	3.476	20926	20.926	20319	20.319	19917	19.917	1530	1.53	1499	1.499	1545	1.545
8	33.2	32.7	33.4	32	31.6	32.2	17993	17.993	17630	17.63	17664	17.664	5967	5.967	5773	5.773	5896	5.896	12026	12.026	11857	11.857	11768	11.768	633	0.633	625	0.625	651	0.651
9	42.6	44	44.3	41.1	42.5	42.7	24419	24.419	24887	24.887	24133	24.133	10392	10.392	10940	10.94	10686	10.686	14027	14.027	13947	13.947	13446	13.446	848	0.848	850	0.85	880	0.88
10	33.1	33.9	33.3	32	32.7	32.1	33139	33.139	33412	33.412	32744	32.744	10978	10.978	11313	11.313	10920	10.92	22161	22.161	22099	22.099	21824	21.824	1199	1.199	1195	1.195	1234	1.234
11	41.1	41.2	42.6	40	40.1	41.4	27294	27.294	27821	27.821	27069	27.069	11217	11.217	11473	11.473	11530	11.53	16077	16.077	16348	16.348	15538	15.538	780	0.78	786	0.786	812	0.812
12	29.5	29.9	30.1	28.3	28.8	28.8	18441	18.441	18386	18.386	17576	17.576	5437	5.437	5505	5.505	5288	5.288	13005	13.005	12881	12.881	12288	12.288	759	0.759	759	0.759	768	0.768
13	37	36.9	38.2	35.4	35.3	36.4	20782	20.782	21138	21.138	20107	20.107	7687	7.687	7809	7.809	7682	7.682	13096	13.096	13329	13.329	12425	12.425	957	0.957	958	0.958	989	0.989
14	21.6	21.5	21.6	20.7	20.6	20.6	25445	25.445	25707	25.707	25835	25.835	5505	5.505	5538	5.538	5574	5.574	19940	19.94	20169	20.169	20261	20.261	1160	1.16	1156	1.156	1191	1.191
15	35	35	35.2	33.4	33.4	33.5	18889	18.889	19062	19.062	19054	19.054	6604	6.604	6669	6.669	6700	6.7	12285	12.285	12393	12.393	12354	12.354	893	0.893	918	0.918	916	0.916
16	21	20	21.2	20	19.1	20.2	21989	21.989	21861	21.861	21051	21.051	4613	4.613	4373	4.373	4458	4.458	17376	17.376	17488	17.488	16592	16.592	1025	1.025	1021	1.021	1049	1.049
17	24.9	27	26.4	23.9	26	25.3	26253	26.253	26295	26.295	26024	26.024	6528	6.528	7109	7.109	6860	6.86	19725	19.725	19186	19.186	19163	19.163	1052	1.052	1068	1.068	1071	1.071
18	34.5	33.4	34.6	33.1	32.1	33.1	25684	25.684	26246	26.246	24925	24.925	8868	8.868	8773	8.773	8619	8.619	16816	16.816	17473	17.473	16306	16.306	1072	1.072	1074	1.074	1089	1.089
19	43.9	42.6	45.3	42.2	41	43.5	19713	19.713	19872	19.872	18762	18.762	8649	8.649	8460	8.46	8503	8.503	11064	11.064	11412	11.412	10259	10.259	769	0.769	774	0.774	798	0.798
20	34.1	36.3	35.1	32.6	34.7	33.5	24298	24.298	23745	23.745	23153	23.153	8295	8.295	8630	8.63	8137	8.137	16003	16.003	15115	15.115	15016	15.016	1134	1.134	1135	1.135	1162	1.162
21	42	40.4	40.6	40.4	38.9	38.9	22171	22.171	21944	21.944	20264	20.264	9310	9.31	8867	8.867	8219	8.219	12862	12.862	13077	13.077	12045	12.045	844	0.844	851	0.851	855	0.855
22	31.9	32	33.4	30.7	30.9	32.1	17333	17.333	17556	17.556	16440	16.44	5530	5.53	5626	5.626	5495	5.495	11804	11.804	11929	11.929	10945	10.945	661	0.661	669	0.669	686	0.686
23	17.8	19	19.1	17	18.1	18.2	27896	27.896	28511	28.511	26899	26.899	4979	4.979	5410	5.41	5144	5.144	22917	22.917	23101	23.101	21756	21.756	1309	1.309	1315	1.315	1357	1.357
24	41.5	43.7	42	40.3	42.4	40.7	28944	28.944	28848	28.848	28403	28.403	12014	12.014	12594	12.594	11915	11.915	16930	16.93	16254	16.254	16488	16.488	835	0.835	866	0.866	861	0.861
25	21.5	22.3	22	20.5	21.1	20.9	26363	26.363	25219	25.219	25198	25.198	5665	5.665	5619	5.619	5540	5.54	20697	20.697	19600	19.6	19658	19.658	1280	1.28	1278	1.278	1301	1.301
26	27.4	28.1	27.5	26.3	26.9	26.3	30534	30.534	30411	30.411	30663	30.663	8381	8.381	8540	8.54	8425	8.425	22154	22.154	21871	21.871	22238	22.238	1327	1.327	1329	1.329	1366	1.366
27	23.7	25.4	24.8	22.7	24.3	23.7	27858	27.858	28039	28.039	26996	26.996	6614	6.614	7115	7.115	6700	6.7	21244	21.244	20924	20.924	20296	20.296	1233	1.233	1241	1.241	1249	1.249
28	19.4	19.9	19.8	18.6	19.1	18.9	27504	27.504	28064	28.064	27117	27.117	5342	5.342	5587	5.587	5373	5.373	22162	22.162	22478	22.478	21744	21.744	1234	1.234	1228	1.228	1246	1.246
29	19.2	18.5	18.5	18.3	17.6	17.6	26656	26.656	26941	26.941	26865	26.865	5128	5.128	4990	4.99	4971	4.971	21528	21.528	21951	21.951	21894	21.894	1434	1.434	1435	1.435	1453	1.453
30	19.8	19	19.9	18.8	18	18.8	22826	22.826	23183	23.183	22875	22.875	4528	4.528	4403	4.403	4560	4.56	18298	18.298	18780	18.78	18315	18.315	1294	1.294	1321	1.321	1330	1.33

## Sheet: Trunk
	Tissue (% fat)	Tissue (% fat)	Tissue (% fat)	Region (%fat)	Region (%fat)	Region (%fat)	Tissue (g)		Tissue (g)		Tissue (g)		Fat (g)		Fat (g)		Fat (g)		Lean (g)		Lean (g)		Lean (g)		BMC (g)		BMC (g)		BMC (g)
Participant	NANA1	NANA2	NHANES	NANA1	NANA2	NHANES	NANA1		NANA2		NHANES		NANA1		NANA2		NHANES		NANA1		NANA2		NHANES		NANA1		NANA2		NHANES
1	21.3	20.4	20.6	20.8	19.8	20.1	39003	39.003	38619	38.619	39368	39.368	8323	8.323	7861	7.861	8100	8.1	30680	30.68	30759	30.759	31267	31.267	1078	1.078	1015	1.015	1032	1.032
2	26.1	26.5	26.9	25.5	25.8	26.2	22691	22.691	22917	22.917	23650	23.65	5925	5.925	6068	6.068	6361	6.361	16766	16.766	16849	16.849	17289	17.289	585	0.585	622	0.622	616	0.616
3	26.2	26.9	26.2	25.6	26.3	25.5	33716	33.716	33766	33.766	34419	34.419	8825	8.825	9091	9.091	9005	9.005	24891	24.891	24675	24.675	25414	25.414	808	0.808	812	0.812	843	0.843
4	30.8	31	31.7	30	30.2	30.9	25469	25.469	25304	25.304	25849	25.849	7847	7.847	7847	7.847	8205	8.205	17622	17.622	17457	17.457	17644	17.644	675	0.675	679	0.679	702	0.702
5	18.4	21.1	20.3	18	20.6	19.8	31154	31.154	31014	31.014	30919	30.919	5729	5.729	6548	6.548	6276	6.276	25425	25.425	24466	24.466	24643	24.643	759	0.759	778	0.778	786	0.786
6	25.2	25.2	24.8	24.5	24.5	24.2	27790	27.79	27631	27.631	29223	29.223	6995	6.995	6957	6.957	7241	7.241	20795	20.795	20673	20.673	21982	21.982	726	0.726	739	0.739	747	0.747
7	11.4	13.6	11.2	11	13.2	10.9	30628	30.628	31627	31.627	31729	31.729	3486	3.486	4317	4.317	3553	3.553	27142	27.142	27310	27.31	28176	28.176	950	0.95	1016	1.016	980	0.98
8	26.3	25.2	26.6	25.7	24.7	26	23647	23.647	23933	23.933	23878	23.878	6217	6.217	6038	6.038	6353	6.353	17430	17.43	17895	17.895	17524	17.524	514	0.514	515	0.515	529	0.529
9	35.9	34.4	34.5	34.9	33.5	33.6	29662	29.662	29319	29.319	29874	29.874	10641	10.641	10095	10.095	10304	10.304	19021	19.021	19224	19.224	19570	19.57	813	0.813	800	0.8	790	0.79
10	39.1	37.9	39.4	38.3	37.1	38.6	45366	45.366	45926	45.926	45515	45.515	17734	17.734	17420	17.42	17936	17.936	27632	27.632	28505	28.505	27579	27.579	971	0.971	969	0.969	999	0.999
11	43.9	44	43.2	43	43.2	42.3	36289	36.289	35668	35.668	36022	36.022	15916	15.916	15707	15.707	15548	15.548	20373	20.373	19962	19.962	20474	20.474	715	0.715	710	0.71	728	0.728
12	29.3	28.9	29.2	28.6	28.2	28.4	25044	25.044	25106	25.106	25861	25.861	7347	7.347	7257	7.257	7540	7.54	17697	17.697	17849	17.849	18321	18.321	659	0.659	658	0.658	673	0.673
13	27.6	28.5	27.9	26.8	27.7	21.1	25695	25.695	25473	25.473	26235	26.235	7081	7.081	7267	7.267	7315	7.315	18614	18.614	18205	18.205	18920	18.92	732	0.732	730	0.73	741	0.741
14	26	24.9	24.3	25.4	24.4	23.8	33514	33.514	33084	33.084	32946	32.946	8703	8.703	8246	8.246	8007	8.007	24811	24.811	24838	24.838	24939	24.939	795	0.795	752	0.752	755	0.755
15	30.8	31.6	31.7	30	30.8	30.8	27194	27.194	26805	26.805	26277	26.277	8370	8.37	8484	8.484	8330	8.33	18824	18.824	18321	18.321	17947	17.947	723	0.723	746	0.746	751	0.751
16	22.1	24.1	24.3	21.5	23.5	23.6	29818	29.818	29367	29.367	30389	30.389	6592	6.592	7090	7.09	7376	7.376	23226	23.226	22278	22.278	23013	23.013	835	0.835	853	0.853	878	0.878
17	23.1	21.8	25.5	22.6	21.4	24.9	33509	33.509	33423	33.423	33455	33.455	7744	7.744	7302	7.302	8535	8.535	25766	25.766	26121	26.121	24919	24.919	810	0.81	761	0.761	873	0.873
18	27.3	26.1	27.6	26.6	25.5	27	32176	32.176	31583	31.583	32753	32.753	8782	8.782	8240	8.24	9047	9.047	23394	23.394	23344	23.344	23706	23.706	794	0.794	780	0.78	796	0.796
19	29.1	34.4	31.9	28.4	33.5	31.2	26538	26.538	25988	25.988	27242	27.242	7710	7.71	8935	8.935	8690	8.69	18828	18.828	17053	17.053	18551	18.551	565	0.565	657	0.657	609	0.609
20	23.1	23.2	25.4	22.5	22.7	24.7	28082	28.082	28476	28.476	28842	28.842	6483	6.483	6609	6.609	7317	7.317	21599	21.599	21867	21.867	21525	21.525	688	0.688	665	0.665	723	0.723
21	32.5	33.2	33.8	31.7	32.4	33	27243	27.243	27175	27.175	28794	28.794	8848	8.848	9031	9.031	9732	9.732	18395	18.395	18144	18.144	19062	19.062	694	0.694	708	0.708	728	0.728
22	28.3	28.4	30.7	27.6	27.7	29.9	25026	25.026	24790	24.79	25745	25.745	7078	7.078	7044	7.044	7902	7.902	17947	17.947	17746	17.746	17843	17.843	604	0.604	596	0.596	642	0.642
23	18.6	20.4	18.4	18.1	19.8	17.9	41265	41.265	40492	40.492	41343	41.343	7665	7.665	8268	8.268	7602	7.602	33600	33.6	32224	32.224	33741	33.741	1084	1.084	1171	1.171	1124	1.124
24	45.5	47	45.7	44.6	46	44.9	40945	40.945	39886	39.886	40806	40.806	18612	18.612	18720	18.72	18668	18.668	22334	22.334	21146	21.146	22138	22.138	789	0.789	799	0.799	793	0.793
25	21.9	22.9	20.7	21.4	22.3	20.3	37678	37.678	38721	38.721	38552	38.552	8245	8.245	8854	8.854	7998	7.998	29433	29.433	29867	29.867	30554	30.554	895	0.895	922	0.922	907	0.907
26	28.2	26.6	28.7	27.4	26	27.9	36533	36.533	36754	36.754	35993	35.993	10293	10.293	9789	9.789	10336	10.336	26240	26.24	26965	26.965	26658	26.658	984	0.984	954	0.954	1001	1.001
27	22.1	22.3	21.6	21.6	21.8	21.1	38414	38.414	38673	38.673	39304	39.304	8477	8.477	8626	8.626	8501	8.501	29937	29.937	30047	30.047	30803	30.803	910	0.91	908	0.908	941	0.941
28	13.7	14.1	14	13.4	13.7	13.7	37129	37.129	36717	36.717	37783	37.783	5077	5.077	5159	5.159	5307	5.307	32052	32.052	31558	31.558	32475	32.475	849	0.849	860	0.86	907	0.907
29	15.8	18.6	16.4	15.4	18.2	16	35608	35.608	35235	35.235	35297	35.297	5631	5.631	6568	6.568	5804	5.804	29997	29.997	28667	28.667	29494	29.494	850	0.85	920	0.92	899	0.899
30	15.5	16.7	16.3	15.1	16.3	15.8	30640	30.64	30390	30.39	30390	30.39	4761	4.761	5085	5.085	4944	4.944	25879	25.879	25305	25.305	25446	25.446	837	0.837	868	0.868	853	0.853

## Sheet: Nana2
Participant	Tissue (% fat)	Region (%fat)	Tissue (g)		Fat (g)		Lean (g)		BMC (g)		Total Mass (kg)
1	22.8	21.8	84645	84.645	19269	19.269	65376	65.376	3864	3.864	88.5
2	28.3	27.2	50494	50.494	14289	14.289	36206	36.206	2030	2.03	52.5
3	24.2	23.3	69324	69.324	16771	16.771	52554	52.554	2805	2.805	72.1
4	31.2	29.9	53292	53.292	16628	16.628	36665	36.665	2269	2.269	55.6
5	19.1	18.4	67639	67.639	12905	12.905	54735	54.735	2652	2.652	70.3
6	26.6	25.5	59579	59.579	15847	15.847	43732	43.732	2583	2.583	62.2
7	14.2	13.5	68843	68.843	9795	9.795	59048	59.048	3611	3.611	72.5
8	28.1	27.1	51010	51.01	14351	14.351	36660	36.66	1861	1.861	52.9
9	37.8	36.5	65073	65.073	24623	24.623	40450	40.45	2424	2.424	67.5
10	34	33	96452	96.452	32832	32.832	63620	63.62	3161	3.161	99.6
11	41.9	40.6	77539	77.539	32489	32.489	45050	45.05	2446	2.446	80
12	29.1	27.9	53852	53.852	15661	15.661	38192	38.192	2316	2.316	56.2
13	31.5	30.2	56817	56.817	17925	17.925	38892	38.892	2544	2.544	59.4
14	22.7	21.9	72855	72.855	16539	16.539	56316	56.316	2740	2.74	75.6
15	32.2	30.8	55738	55.738	17933	17.933	37805	37.805	2557	2.557	58.3
16	21.9	21	63787	63.787	13989	13.989	49798	49.798	2832	2.832	66.6
17	23.1	22.3	75343	75.343	17417	17.417	57929	57.929	2829	2.829	78.2
18	29.1	28.1	70363	70.363	20510	20.51	49852	49.852	2700	2.7	73.1
19	36.3	34.9	56349	56.349	20472	20.472	35876	35.876	2254	2.254	58.6
20	29.6	28.3	63237	63.237	18669	18.669	44538	44.538	2802	2.802	66
21	35.7	34.3	59838	59.838	21362	21.362	38476	38.476	2398	2.398	62.2
22	30	28.9	52079	52.079	15610	15.61	36468	36.468	1998	1.998	54.1
23	19.3	18.5	85763	85.763	16565	16.565	69198	69.198	3566	3.566	89.3
24	44.3	43.1	82201	82.201	36449	36.449	45752	45.752	2432	2.432	84.6
25	21.8	20.9	79674	79.674	17366	17.366	62308	62.308	3298	3.298	83
26	26.5	25.5	81378	81.378	21564	21.564	59814	59.814	3260	3.26	84.6
27	22.9	22	82638	82.638	18904	18.904	68834	68.834	3220	3.22	85.9
28	16.6	16	79918	79.918	13296	13.296	66623	66.623	3046	3.046	83
29	18.5	17.7	76686	76.686	14158	14.158	62529	62.529	3488	3.488	80.2
30	17.9	17	66358	66.358	11875	11.875	54483	54.483	3298	3.298	69.7

## Sheet: NHANES
Participant	Tissue (% fat)	Region (%fat)	Tissue (g)		Fat (g)		Lean (g)		BMC (g)		Total Mass (kg)
1	22.7	21.7	84072	84.072	19076	19.076	64996	64.996	3876	3.876	87.9
2	28.6	27.5	50157	50.157	14327	14.327	35830	35.83	2027	2.027	52.2
3	23.8	22.9	69009	69.009	16432	16.432	52577	52.577	2856	2.856	71.9
4	31.5	30.2	52878	52.878	16668	16.668	36210	36.21	2317	2.317	55.2
5	18.5	17.8	67191	67.191	12442	12.442	54749	54.749	2690	2.69	69.9
6	25.7	24.6	58945	58.945	15165	15.165	43780	43.78	2577	2.577	61.5
7	13.1	12.5	68277	68.277	8976	8.976	59301	59.301	3669	3.669	71.9
8	29.4	28.3	50632	50.632	14893	14.893	35738	35.738	1935	1.935	52.6
9	38.1	36.7	54610	54.61	24621	24.621	39990	39.99	2471	2.471	67.1
10	34.9	33.7	95360	95.36	33285	33.285	62074	62.074	3265	3.265	98.6
11	42.6	41.3	77154	77.154	32875	32.875	44278	44.278	2519	2.519	79.7
12	29.7	28.4	53359	53.359	15840	15.84	37519	37.519	2373	2.373	55.7
13	32.1	30.7	56290	56.29	18065	18.065	38226	38.226	2613	2.613	58.9
14	22.6	21.8	72356	72.356	16356	16.356	55999	55.999	2784	2.784	75.1
15	33	31.5	55126	55.126	18206	18.206	36920	36.92	2586	2.586	57.7
16	22.1	21.1	63507	63.507	14005	14.005	49502	49.502	2871	2.871	66.4
17	24.9	24	74610	74.61	18596	18.596	56014	56.014	2956	2.956	77.6
18	30.3	29.2	69410	69.41	21036	21.036	48374	48.374	2717	2.717	72.1
19	36.4	35	56151	56.151	20461	20.461	35690	35.69	2261	2.261	58.4
20	30.2	28.9	62807	62.807	18999	18.999	43808	43.808	2887	2.887	65.7
21	36.4	34.9	59556	59.556	21674	21.674	37881	37.881	2471	2.471	62
22	31.9	30.6	51541	51.541	16419	16.419	35122	35.122	2076	2.076	53.6
23	18.6	17.8	85115	85.115	15808	15.808	69307	69.307	3622	3.622	88.7
24	43.4	42.1	81671	81.671	35411	35.411	46260	46.26	2402	2.402	84.1
25	21	20.1	79522	79.522	16689	16.689	62822	62.822	3315	3.315	82.8
26	27.4	26.3	80738	80.738	22150	22.15	58588	58.588	3355	3.355	84.1
27	22.3	21.4	81829	81.829	18230	18.23	63559	63.559	3275	3.275	85.1
28	16.6	16	79396	79.396	13173	13.173	66223	66.223	3123	3.123	82.5
29	17.8	17	76371	76.371	13589	13.589	62782	62.782	3494	3.494	79.9
30	18.2	17.3	65973	65.973	11994	11.994	53979	53.979	3310	3.31	69.3

## Sheet: Lx1
	L2-L4
Participant	BMD (g/mc2)		BMC (g)	Area
1	1.543	154.3	86.21	55.85
2	1.28	128	50.85	39.72
3	1.163	116.3	56.01	48.15
4	1.24	124	46.18	37.26
5	1.287	128.7	54.46	42.32
6	1.184	118.4	58.61	49.51
7	1.284	128.4	69.78	54.36
8	1.121	112.1	38.3	34.18
9	1.37	137	69.88	51
10	1.219	121.9	54.45	44.65
11	1.279	127.9	47.74	37.32
12	1.187	118.7	49.05	41.33
13	1.351	135.1	56.4	41.74
14	1.15	115	51.8	45.04
15	1.356	135.6	57.18	42.18
16	1.469	146.9	65.48	44.57
17	1.183	118.3	55.81	47.17
18	1.405	140.5	66.08	47.04
19	1.252	125.2	50.96	40.72
20	1.119	111.9	55.5	49.61
21	1.243	124.3	56.31	45.31
22	1.244	124.4	45.09	36.24
23	1.511	151.1	81.41	37.32
24	1.279	127.9	59.86	46.79
25	1.137	113.7	60.06	52.8
26	1.414	141.4	77.05	54.5
27	1.086	108.6	58.34	53.73
28	1.092	109.2	59.24	54.23
29	1.33	133	68.46	51.46
30	1.284	128.4	62.48	48.67

## Sheet: Lx2
	L2-L4
Participant	BMD (g/mc2)		BMC (g)	Area
1	1.566	156.6	87.08	55.61
2	1.25	125	50.02	40.01
3	1.159	115.9	56.73	48.96
4	1.262	126.2	47.33	37.52
5	1.308	130.8	54.27	41.5
6	1.199	119.9	56.52	47.15
7	1.272	127.2	46.13	36.47
8	1.121	112.1	38.54	34.38
9	1.371	137.1	68.51	49.97
10	1.233	123.3	54.41	44.13
11	1.296	129.6	48.25	37.22
12	1.188	118.8	48.71	41
13	1.365	136.5	56.24	41.19
14	1.113	111.3	54.25	48.72
15	1.336	133.6	56.84	42.55
16	1.486	148.6	66.08	44.47
17	1.198	119.8	56.34	47.01
18	1.422	142.2	65.45	46.04
19	1.22	122	49.18	40.23
20	1.106	110.6	53.53	48.41
21	1.24	124	56.04	45.18
22	1.226	122.6	44.6	36.38
23	1.525	152.5	81.62	53.52
24	1.28	128	58.8	45.96
25	1.125	112.5	60.19	53.52
26	1.421	142.1	76.67	53.94
27	1.074	107.4	58.42	54.4
28	1.094	109.4	58.66	53.59
29	1.336	133.6	67.44	50.47
30	1.277	127.7	62.52	48.97

## Sheet: Hip1
Participant	Side	Neck				Total
		BMD (g/mc2)		BMC (g)	Area	BMD (g/mc2)		BMC (g)	Area
1	Left	1.182	118.2	7.5	6.35	1.201	120.1	50.6	42.13
2	Left	1.104	110.4	4.62	4.18	1.102	110.2	29.55	26.82
3	Left	0.995	99.5	5.53	5.56	0.991	99.1	35.5	35.82
4	Left	1.026	102.6	4.67	4.55	1.067	106.7	29.52	27.66
5	Left	1.265	126.5	6.03	4.77	1.322	132.2	37.26	28.18
6	Left	1.071	107.1	4.72	4.4	1.006	100.6	31.67	31.49
7	Left	1.23	123	6.99	5.68	1.372	137.2	54.4	39.66
8	Left	0.88	88	3.65	4.15	0.934	93.4	26.13	27.97
9	Left	1.106	110.6	5.34	4.82	1.137	113.7	35.11	30.88
10	Left	1.128	112.8	5.63	4.99	1.186	118.6	38.69	32.63
11	Left	1.023	102.3	4.79	4.68	1.001	100.1	30.13	30.11
12	Left	1.162	116.2	4.83	4.15	1.205	120.5	33.19	27.55
13	Left	1.159	115.9	5.58	4.82	1.171	117.1	37.24	31.81
14	Left	1.026	102.6	5.76	5.62	1.025	102.5	36.93	36.04
15	Left	1.348	134.8	5.32	3.95	1.195	119.5	32.03	26.8
16	Left	1.195	119.5	6.3	5.28	1.187	118.7	41.81	35.24
17	Right	0.986	98.6	5.47	5.55	0.969	96.9	35.01	36.13
18	Left	1.097	109.7	5.19	4.73	1.102	110.2	36.74	33.33
19	Left	0.966	96.6	4.36	4.51	0.996	99.6	31.72	31.86
20	Left	0.986	98.6	4.97	5.05	0.946	94.6	33.64	35.57
21	Left	0.904	90.4	4.37	4.84	0.904	90.4	28.85	31.92
22	Right	1.009	100.9	4.75	4.71	1.081	108.1	28.63	26.48
23	Left	1.282	128.2	7.28	5.68	1.257	125.7	51.04	40.61
24	Left	1.171	117.1	5.62	4.8	1.157	115.7	36.81	31.82
25	Left	1.269	126.9	6.38	5.03	1.377	137.7	47.97	34.82
26	Left	1.161	116.1	6.32	5.45	1.15	115	39.14	34.04
27	Right	1.055	105.5	5.51	5.22	1.024	102.4	37.2	36.32
28	Left	1.11	111	5.92	5.33	1.1	110	41.88	38.07
29	Left	1.068	106.8	6.39	5.99	1.091	109.1	42.23	38.69
30	Left	1.209	120.9	6.35	5.25	1.154	115.4	44.51	38.58

[truncated: 3 more sheets: Sheet1, Hip2, Sheet2]
